# Supplementary material for: Secondary structure impacts patterns of selection in human lncRNAs
Source: PubMed Central journal article supplement (PMC4960838; doi:10.1186/s12915-016-0283-0), 2016-07-25
Supplement: 12915_2016_283_MOESM1_ESM.pdf [file 12915_2016_283_MOESM1_ESM.pdf]

**Figure S1:** Boxplots showing mean phastCons scores for exons and introns of lincRNAs, protein coding genes and intergenic regions located within 1 and 5kb from any of the lincRNA (protCod1kb/P1kb, protCod5kb/P5kb, i1kb and i5kb, respectively) for the functional and broad human data sets. Horizontal lines inside the boxes represent the median, boxes show the interquartile range (IQR, distance between first and third quartiles), vertical lines correspond to the highest and lowest value within 1.5\*IQR and dots represent outliers. Heatmaps show the adjusted *P* value after Wilcoxon test and red stars indicate statistically significant differences in the comparison.

**Figure S2:** Density plots showing the distribution of differences in the mean phastCons scores of exons and introns computed for each lincRNA. The two density plots correspond to the functional (red) and broad (blue) human lincRNA sets. Dashed-vertical line designates mean Phastcons exons = introns (i.e. exons - introns = 0). Values at the right of the vertical bar are cases in which exons > introns (i.e. exons - introns >0); values at the left of the vertical bar are cases in which exons < introns (i.e. exons - introns <0).

**Figure S3:** Proportion of repeats found in the functional, broad and best matches subset (Broad\_BM). Broad\_BM is a subset of 351 sequences having the same levels of repeated elements than the functional set (see Materials and Methods). The proportion of repeats was calculated as the mean percentage of sequence covered by a certain type of repeated element divided by the mean percentage of sequence covered by repeats, for each data set.

**Figure S4:** Boxplots showing mean phastCons scores for exons and introns of lincRNAs for the functional, broad human and Broad\_BM data sets. Horizontal lines inside the boxes represent the median, boxes show the interquartile range (IQR, distance between first and third quartiles), vertical lines correspond to the highest and lowest value within 1.5\*IQR and dots represent outliers. Broad\_BM is a subset of 351 sequences having the same levels of repeated elements than the functional set (see Materials and Methods).

**Figure S5:** Above: median SNP density (i.e. number of SNPs / length in nucleotides) and 95% confidence interval for exonic and intronic regions of lincRNA, nearby protein coding genes (1 and 5 kb) and surrounding intergenic regions (1 and 5 kb). Below: p-values after Wilcoxon test. For the human data set we plotted (a) African, (b) Ad Mixed American, (c) European, (d) East Asian and (e) South Asian populations.

**Figure S6:** Density plots showing differences in SNP density (i.e. number of SNPs/ length) of exons minus introns computed for each lincRNA. in the functional (red) and broad (blue) sets. Plots were computed for the five major human populations: African (AFR), Ad Mixed American (AMR), European (EUR), East Asian (EAS) and South Asian populations (SAS). Table shows *P* value after comparing the functional and the broad sets within each population using Wilcoxon test. Vertical line designates mean SNP density exons = introns (i.e. exons - introns = 0). Values at the right of the vertical bar are cases in which SNP density exons > introns (i.e. exons -introns >0); values at the left of the vertical bar are cases in which SNP density exons < introns (i.e. exons -introns <0).

**Figure S7:** Boxplots showing SNP density (i.e. number of SNPs/ length) in exons (green) and introns (yellow) for the five major human populations (African (AFR), Ad Mixed American (AMR), European (EUR), East Asian (EAS) and South Asian (SAS)) in the functional (a) and the broad (b) sets. Horizontal line inside boxes represents the median, boxes show the interquartile range (IQR, distance between first and third quartiles), vertical lines correspond to the highest and lowest value within 1.5\*IQR and dots represent outliers. Table shows median values within each category and *P* value after applying a Wilcoxon test.

**Figure S8:** (a) Mean nucleotide variability ( $\pi$ ) for exonic and intronic regions of broad and broad\_BM sets. Error bars represent the standard error of the mean. (b) Tajima's D values for exonic and intronic regions for broad and broad\_BM sets. Horizontal lines inside boxes represent the medians, boxes show the interquartile range (IQR, distance between first and third quartiles), vertical lines correspond to the highest and lowest value within 1.5\*IQR and dots represent outliers. Broad\_BM is a subset of 351 sequences having the same levels of repeated elements than the functional set (see Materials and Methods).

**Figure S9:** Derived allele frequency (DAF) for exonic (green) and intronic (yellow) regions of the functional and broad human data sets in the five major populations: African (AFR), Ad Mixed American (AMR), European (EUR), East Asian (EAS) and South Asian populations (SAS).

**Figure S10:** Comparison of the accessibility distribution in the functional, broad, intergenic, rRNA and mRNA sets for values obtained using the Sfold program (a) and the RNAfold program (b).

**Figure S11:** Median accessibility for conserved (red) and non-conserved (blue) positions calculated using the Sfold and the RNAfold programs. Horizontal line inside boxes represents the median, boxes show the interquartile range (IQR, distance between first and third quartiles), vertical lines

correspond to the highest and lowest value within  $1.5 \times \text{IQR}$  and dots represent outliers.

**Figure S12:** Differences between accessibility distributions of positions with or without SNPs within a given range of accessibilities (0-0.1, 0.1-0.2, 0.2-0.3, 0.3-0.4, 0.4-0.5, 0.5-0.6, 0.6-0.7, 0.7-0.8, 0.8-0.9, 0.9-1). Probabilities within ranges were calculated using the `integrate.xy` function on a density distribution (see material and methods). Vertical lines represent the confidence intervals estimated using a bootstrapping after 1000 replicates. Accessibility was computed using the `Sfold` program for the AMR (b), EUR (c), EAS (d) and SAS (d) populations and the `RNAfold` program for the AMR (e), EUR (f), EAS (g) and SAS (h) populations

**Figure S13:** Differences between accessibility distributions of positions with or without SNPs for the whole functional and broad sets (in blue) and for those lncRNA likely to be fully annotated (in red, see results section), within a given range of accessibilities (0-0.1, 0.1-0.2, 0.2-0.3, 0.3-0.4, 0.4-0.5, 0.5-0.6, 0.6-0.7, 0.7-0.8, 0.8-0.9, 0.9-1). Probabilities within ranges were calculated using the `integrate.xy` function on a density distribution (see material and methods). Vertical lines represent the confidence intervals estimated using a bootstrapping after 1000 replicates. Accessibility was computed using both the `RNAfold` and `Sfold` programs.

**Figure S14:** Boxplots showing the correlation between the mean accessibility and the mean % GC, and the mean number of SNPs and the mean % GC, calculated in non-overlapped windows of 5 nucleotides for both the functional and the broad set in the five major populations: African (AFR) using the `Sfold` (a) and `RNAfold` (b) programs, Ad Mixed American (AMR) using the `Sfold` (c) and `RNAfold` (d) programs, European (EUR) using the `Sfold` (e) and `RNAfold` (f) programs, East Asian (EAS) using the `Sfold` (g) and `RNAfold` (h) programs and South Asian populations (SAS) using the `Sfold` (i) and `RNAfold` (j) programs.

**Figure S15:** Differences between accessibility distributions of positions with or without SNPs for regions annotated as ESE (blue) and the rest of the regions (blue) for the functional and the broad sets. Each dot represents the probability of not having SNPs minus the probability of having SNPs within a given range of accessibilities (0-0.1, 0.1-0.2, 0.2-0.3, 0.3-0.4, 0.4-0.5, 0.5-0.6, 0.6-0.7, 0.7-0.8, 0.8-0.9, 0.9-1). Probabilities within ranges were calculated using the `integrate.xy` function on a density distribution (see material and methods). Vertical lines represent the confidence intervals estimated using a bootstrapping after 500 replicates. Accessibility was computed using both the `Sfold` (a) and `Sfold` (b) programs.

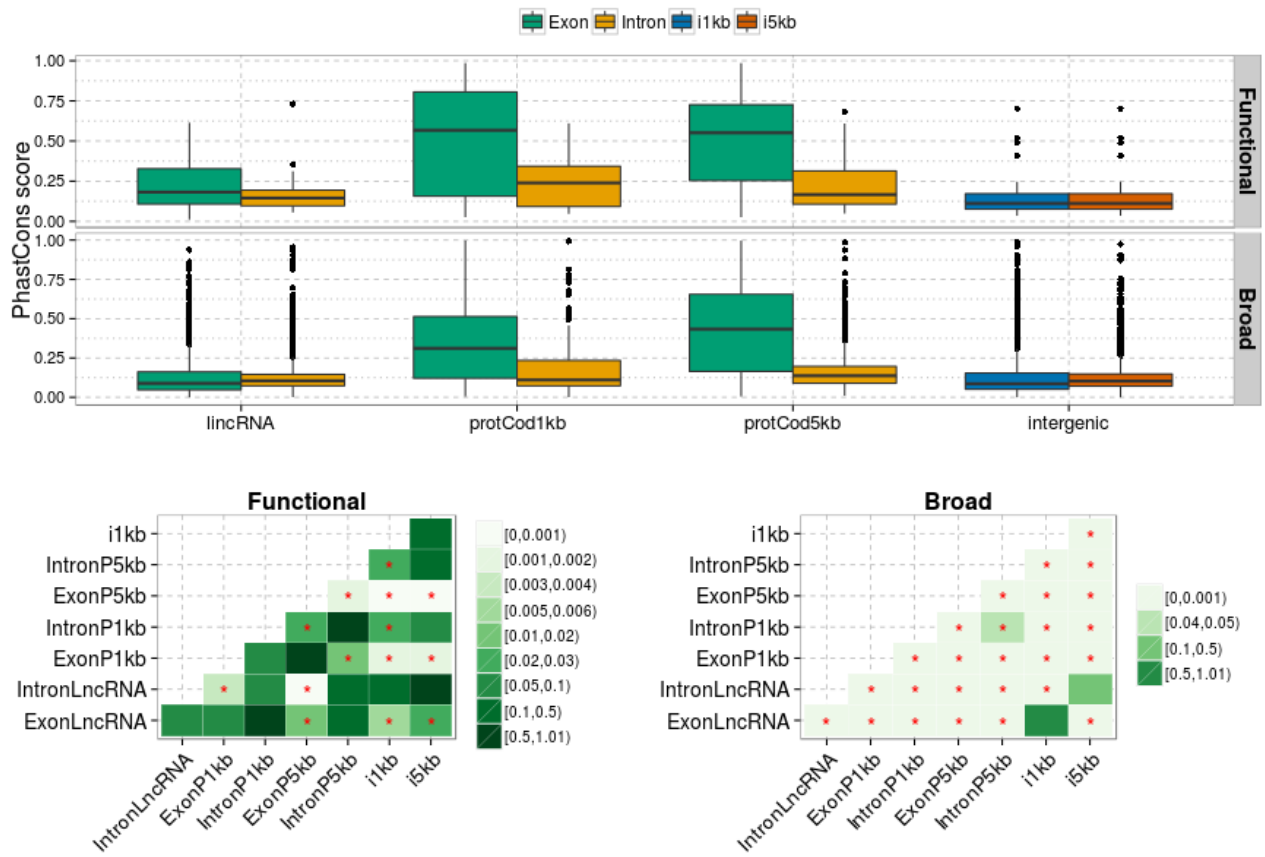

Sup. Fig. 1

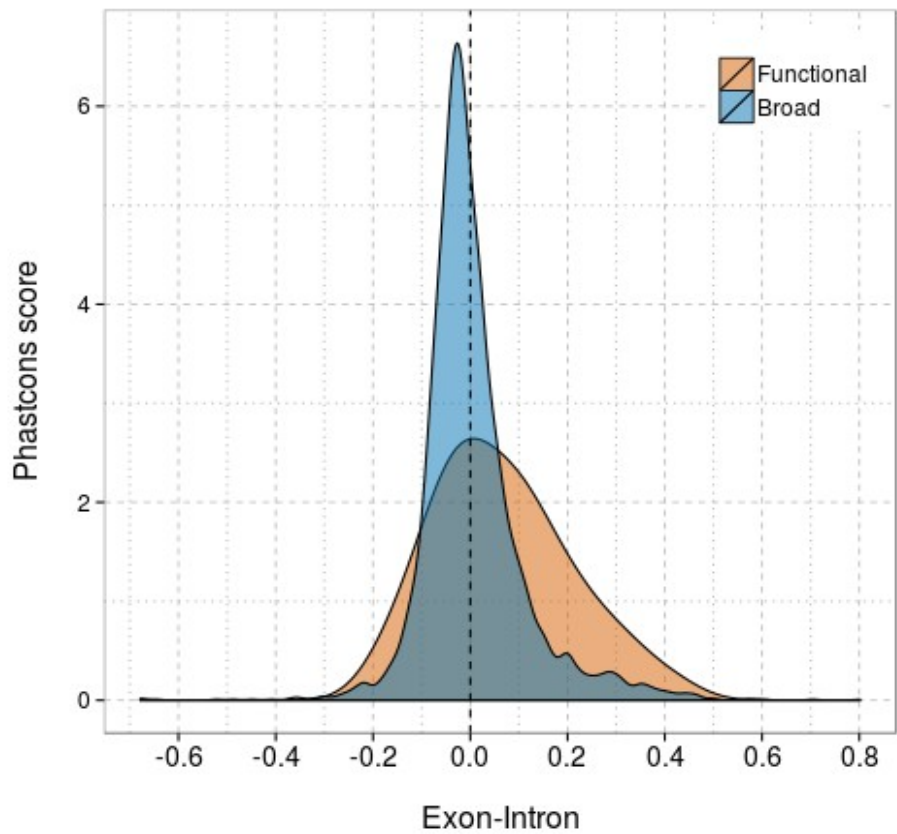

Sup. Fig. 2



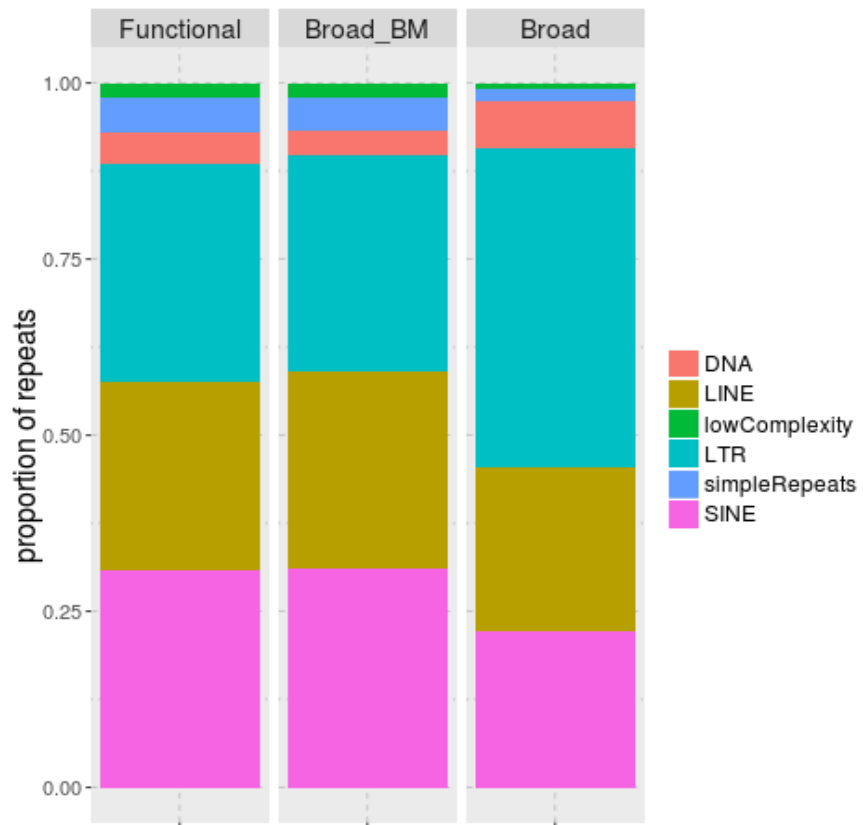

Sup. Fig. 3

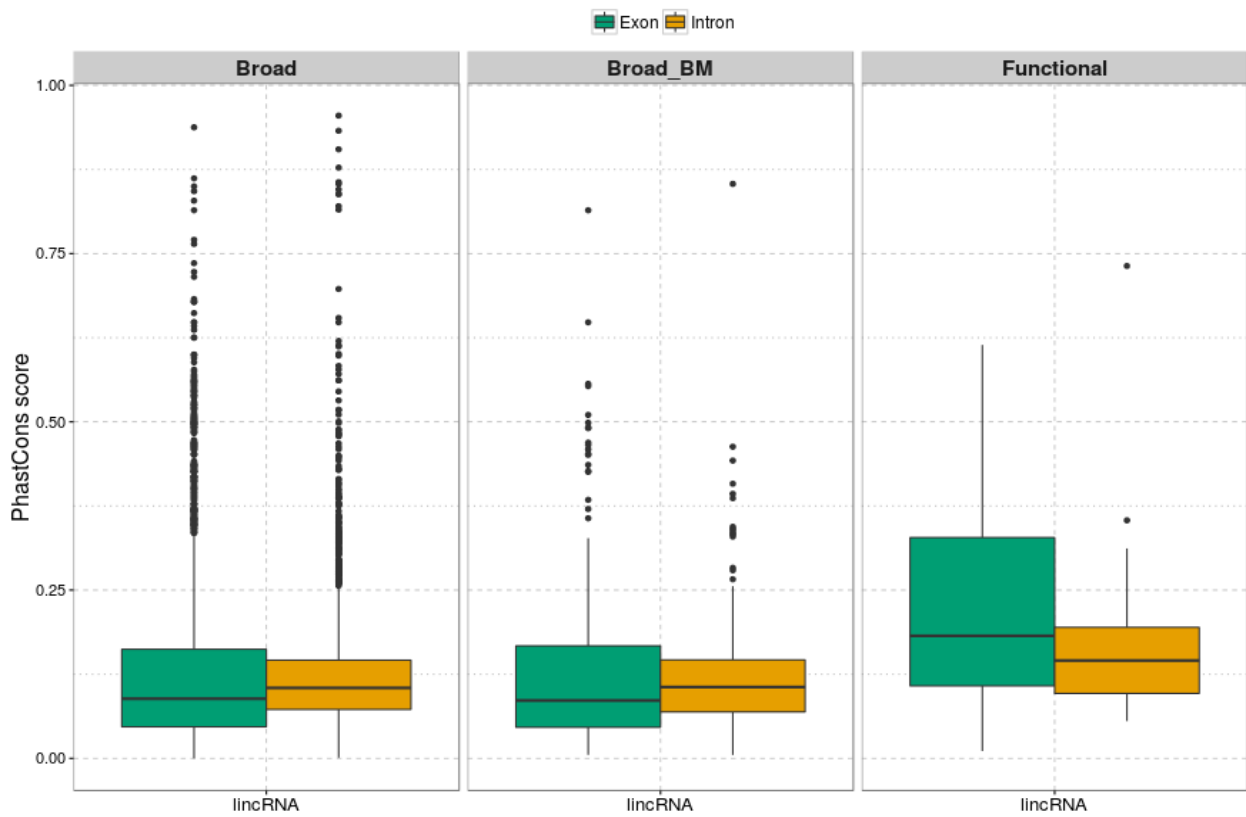

Sup. Fig. 4

Sup. Fig. 5

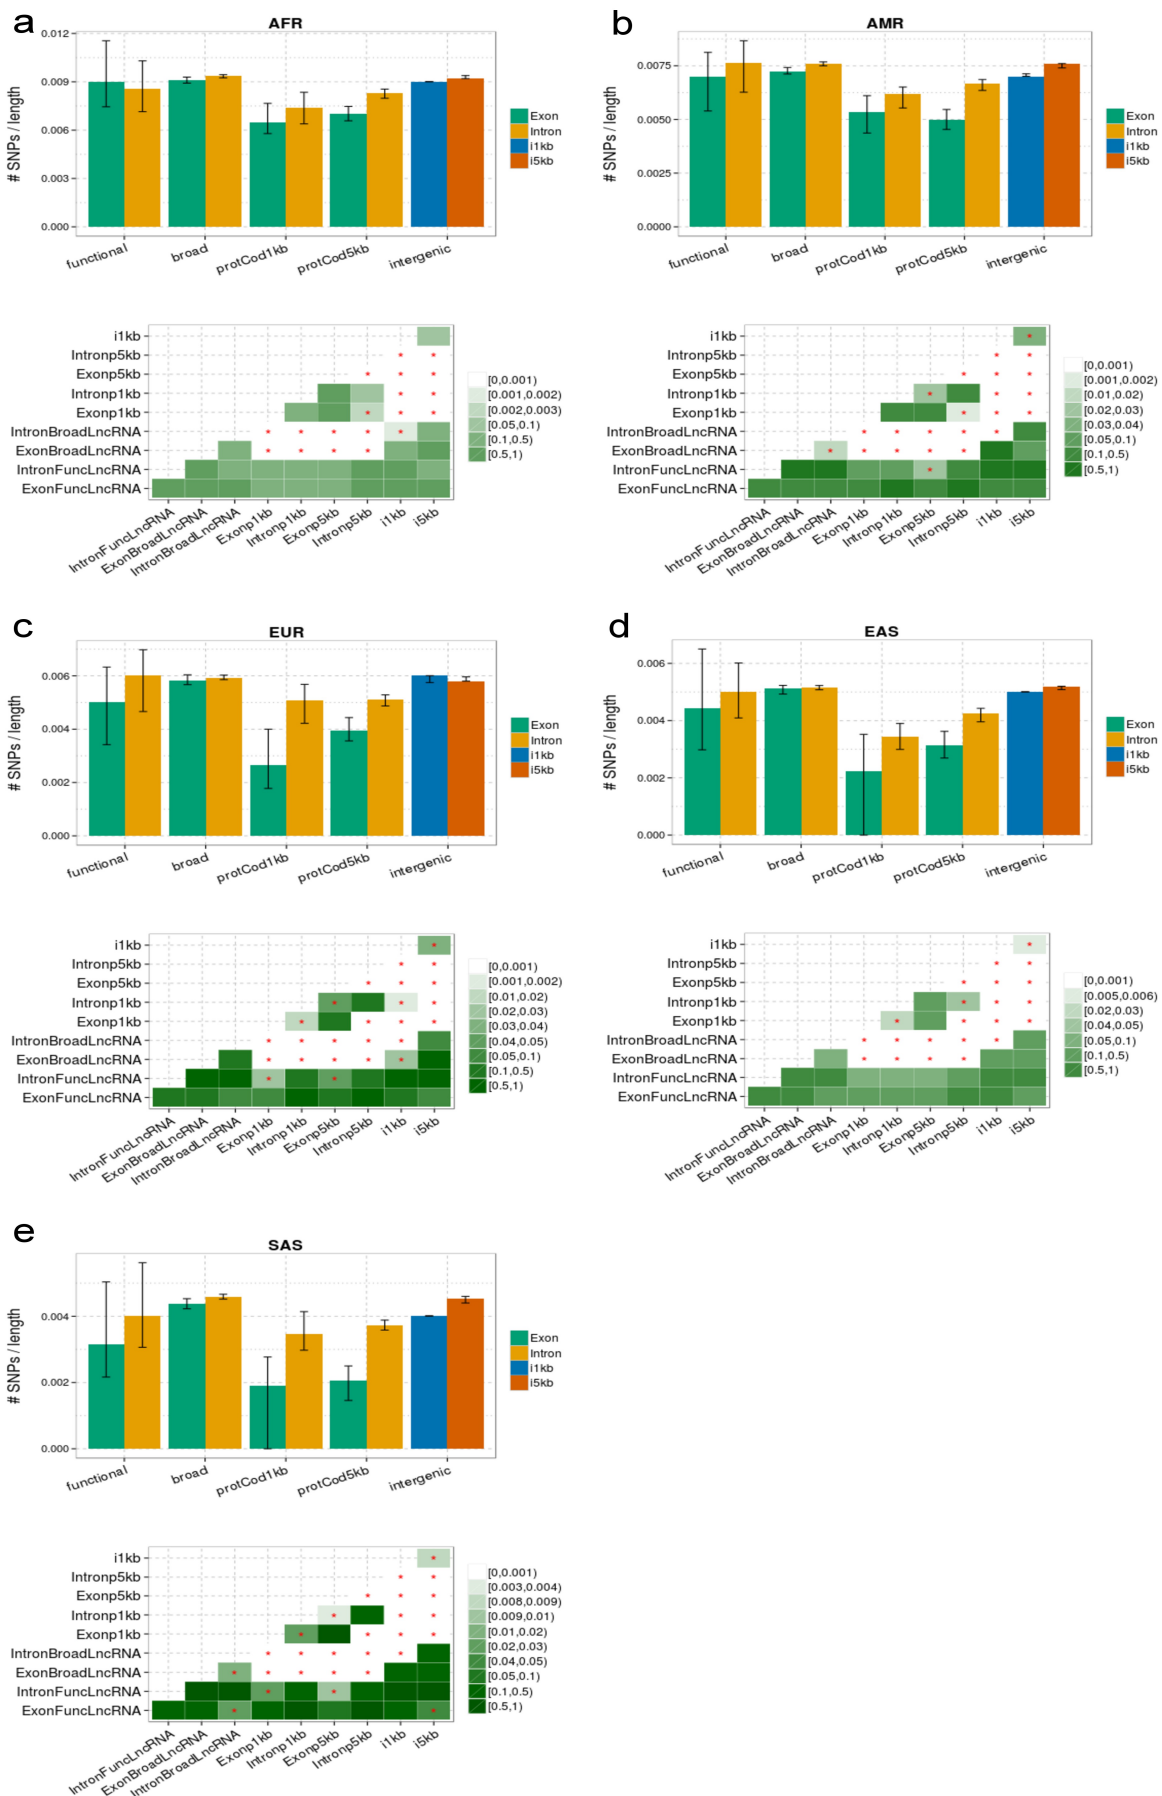

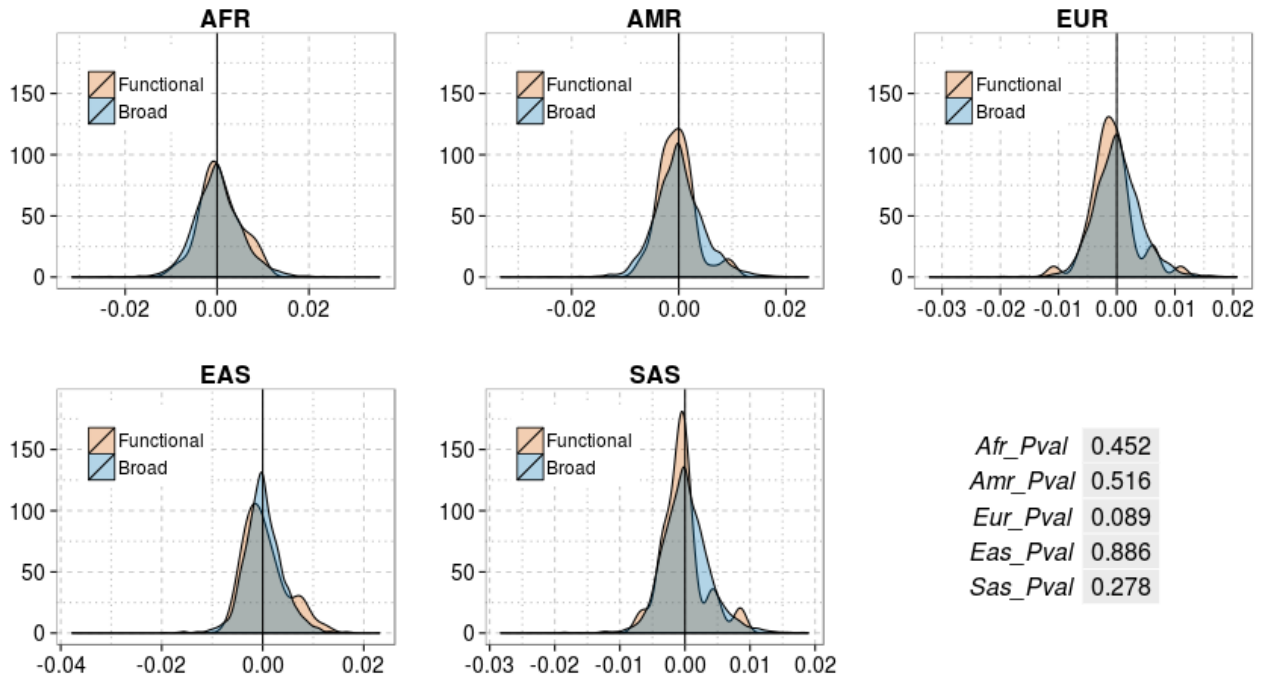

Sup. Fig. 6

**a**

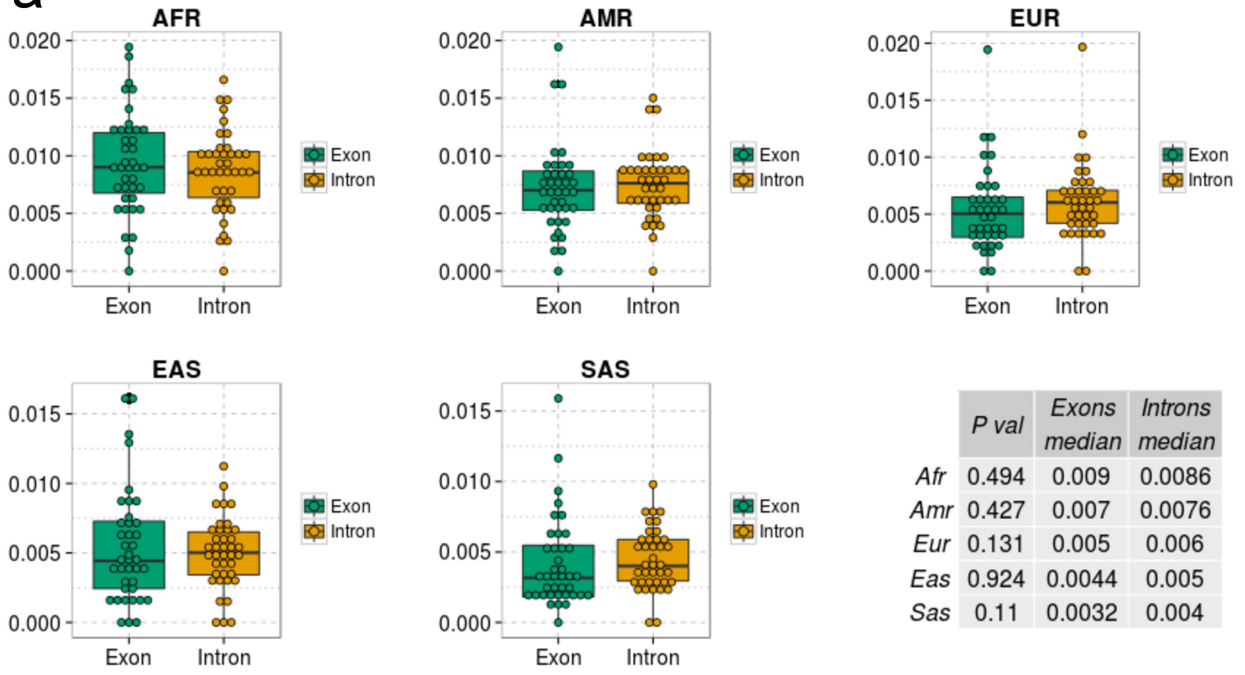

**b**

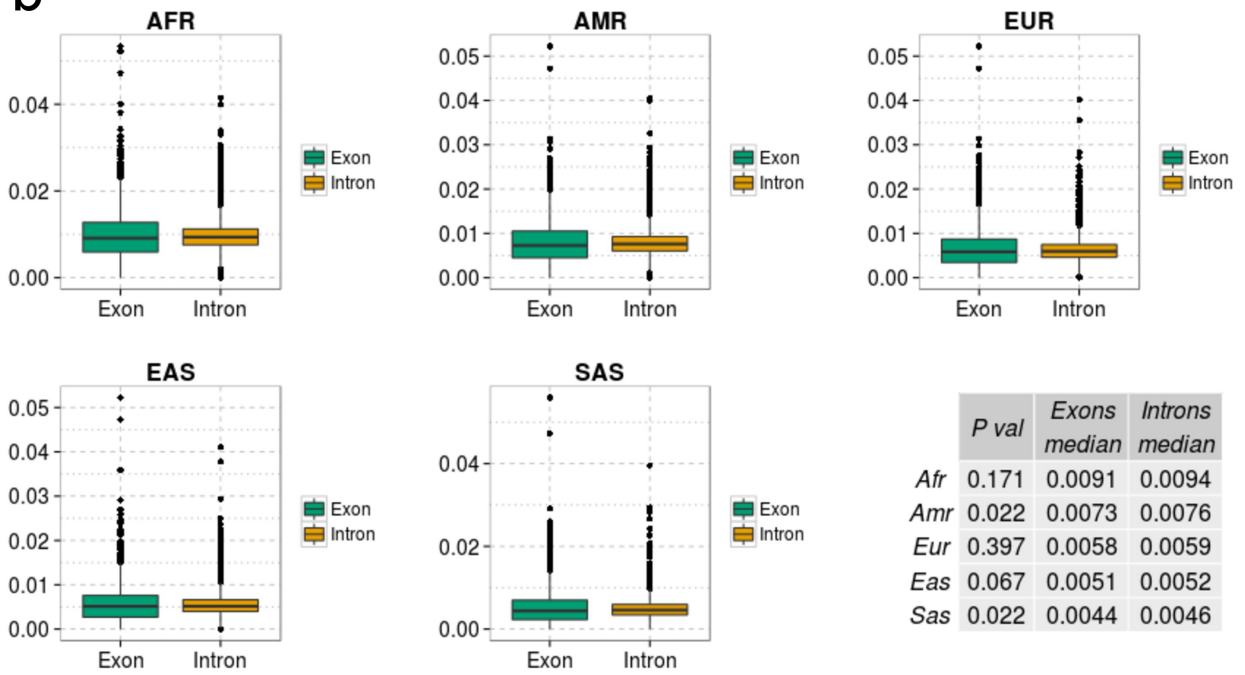

Sup. Fig. 7

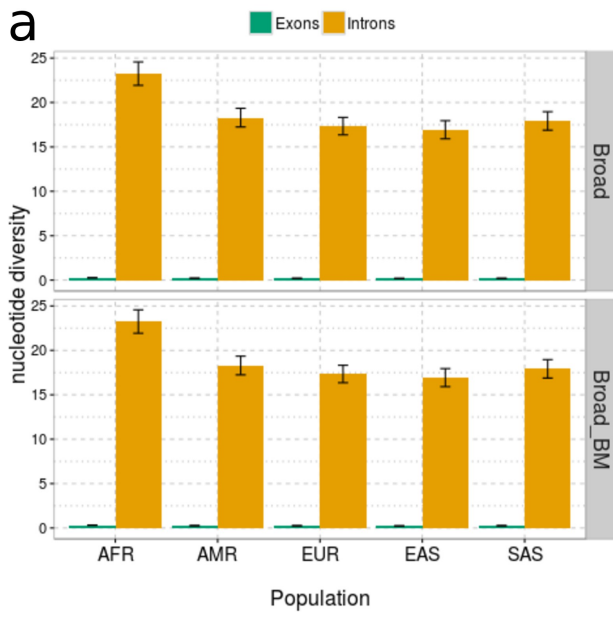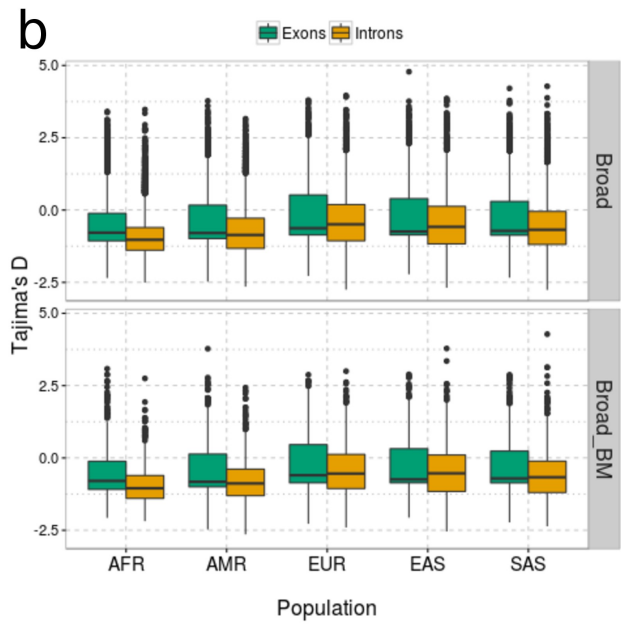

Sup. Fig. 8

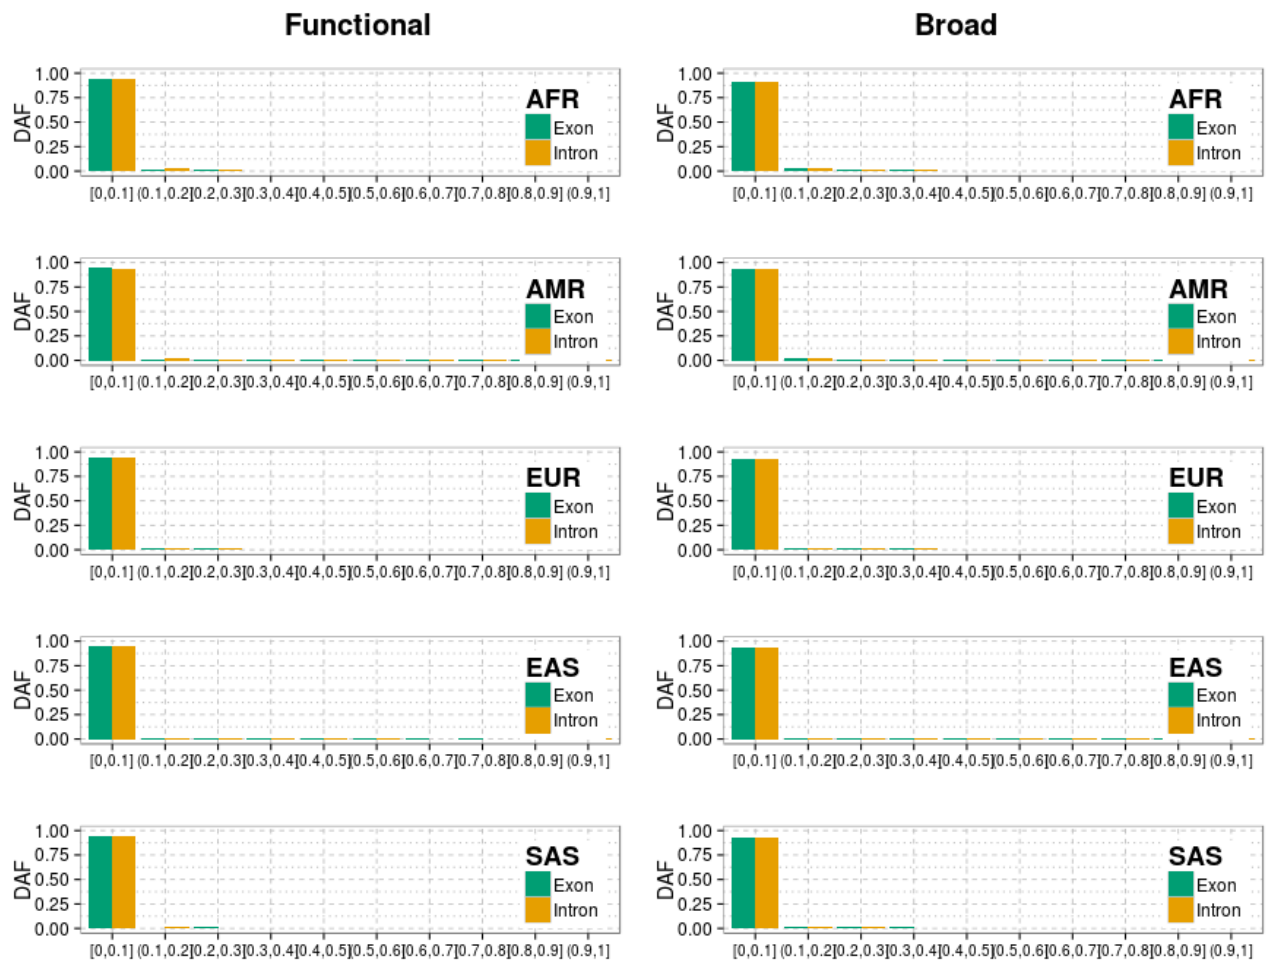

Sup. Fig. 9

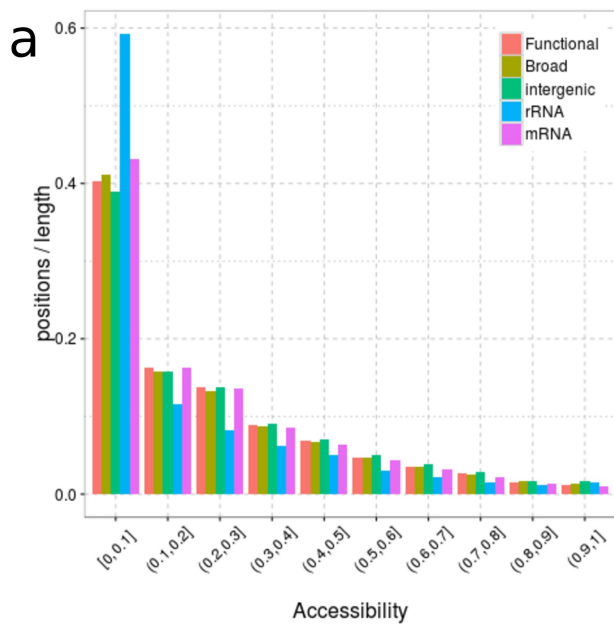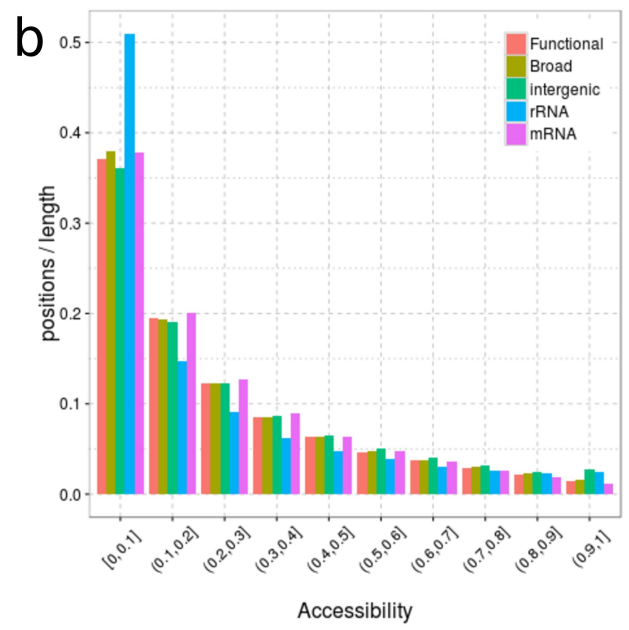

Sup. Fig. 10

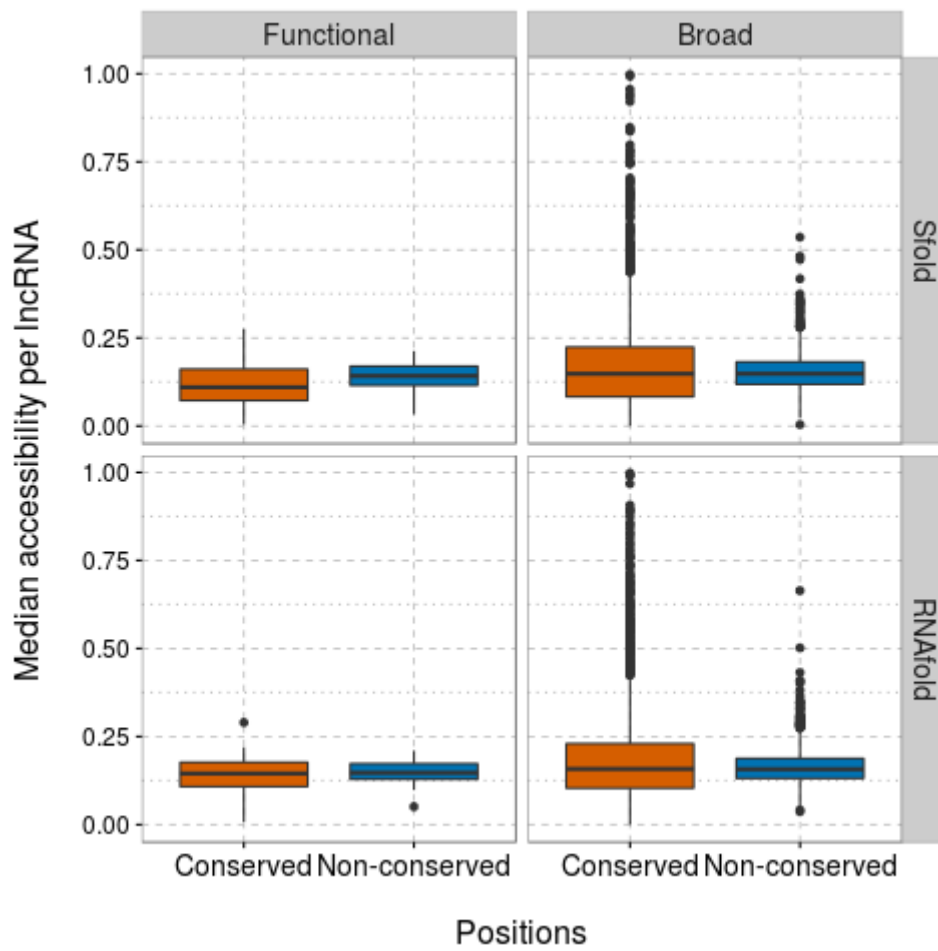

Sup. Fig. 11

Sup. Fig. 12

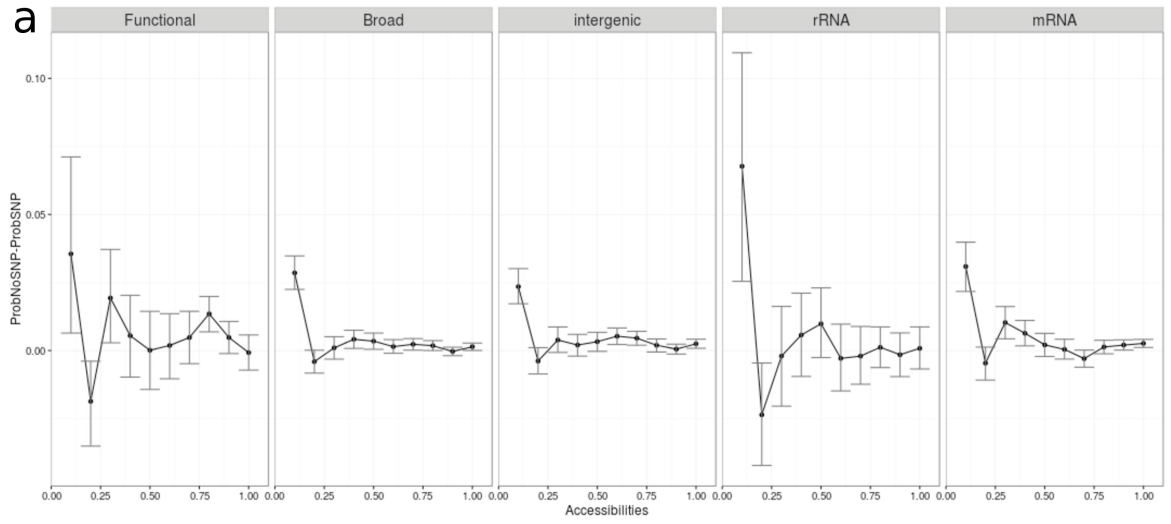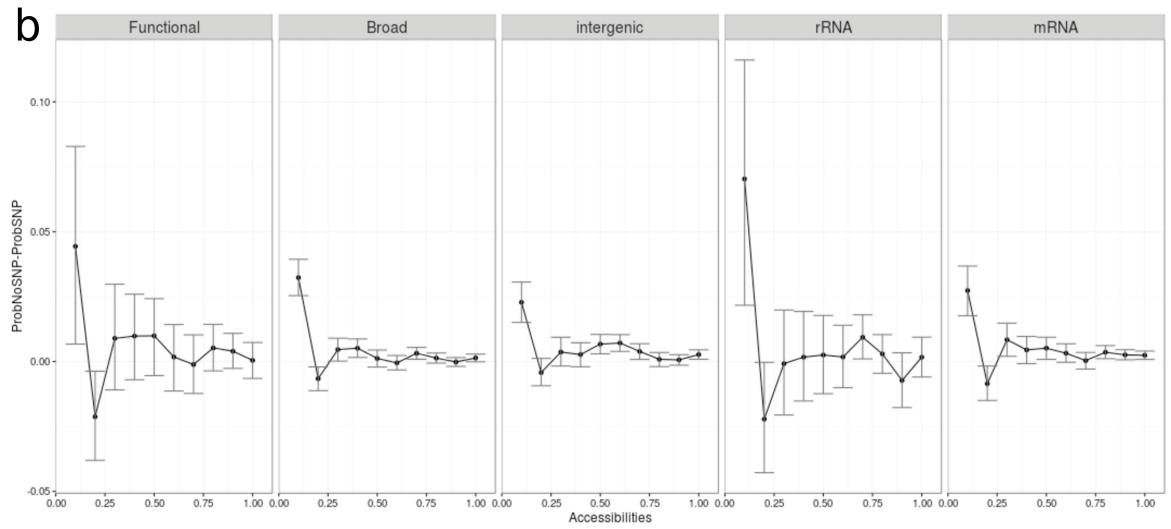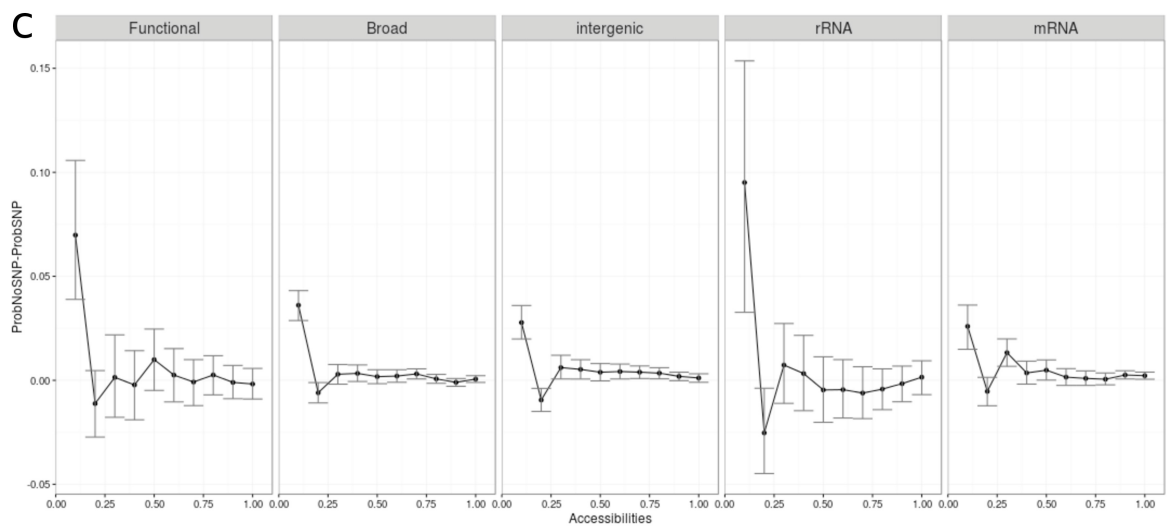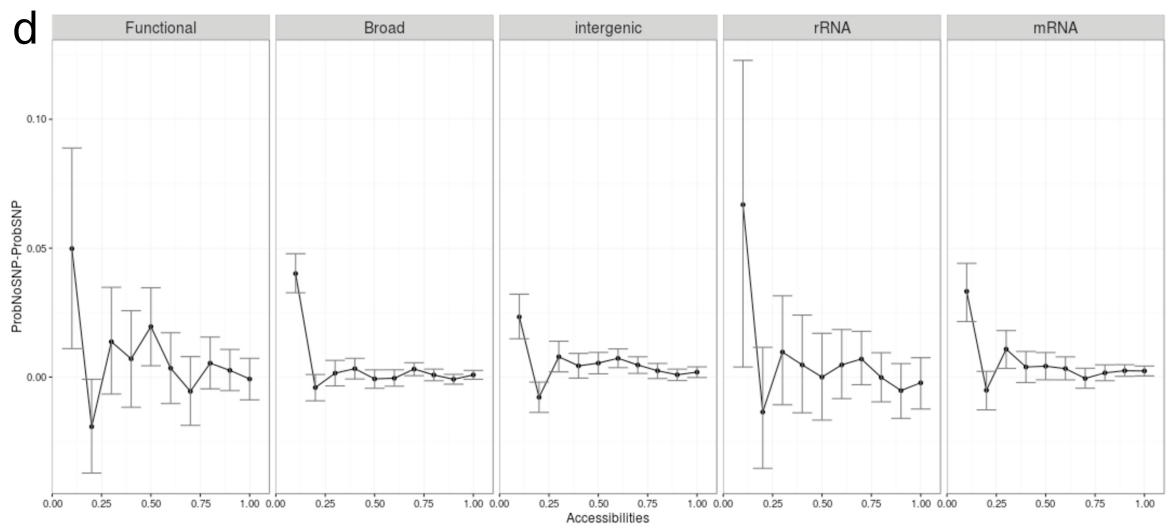





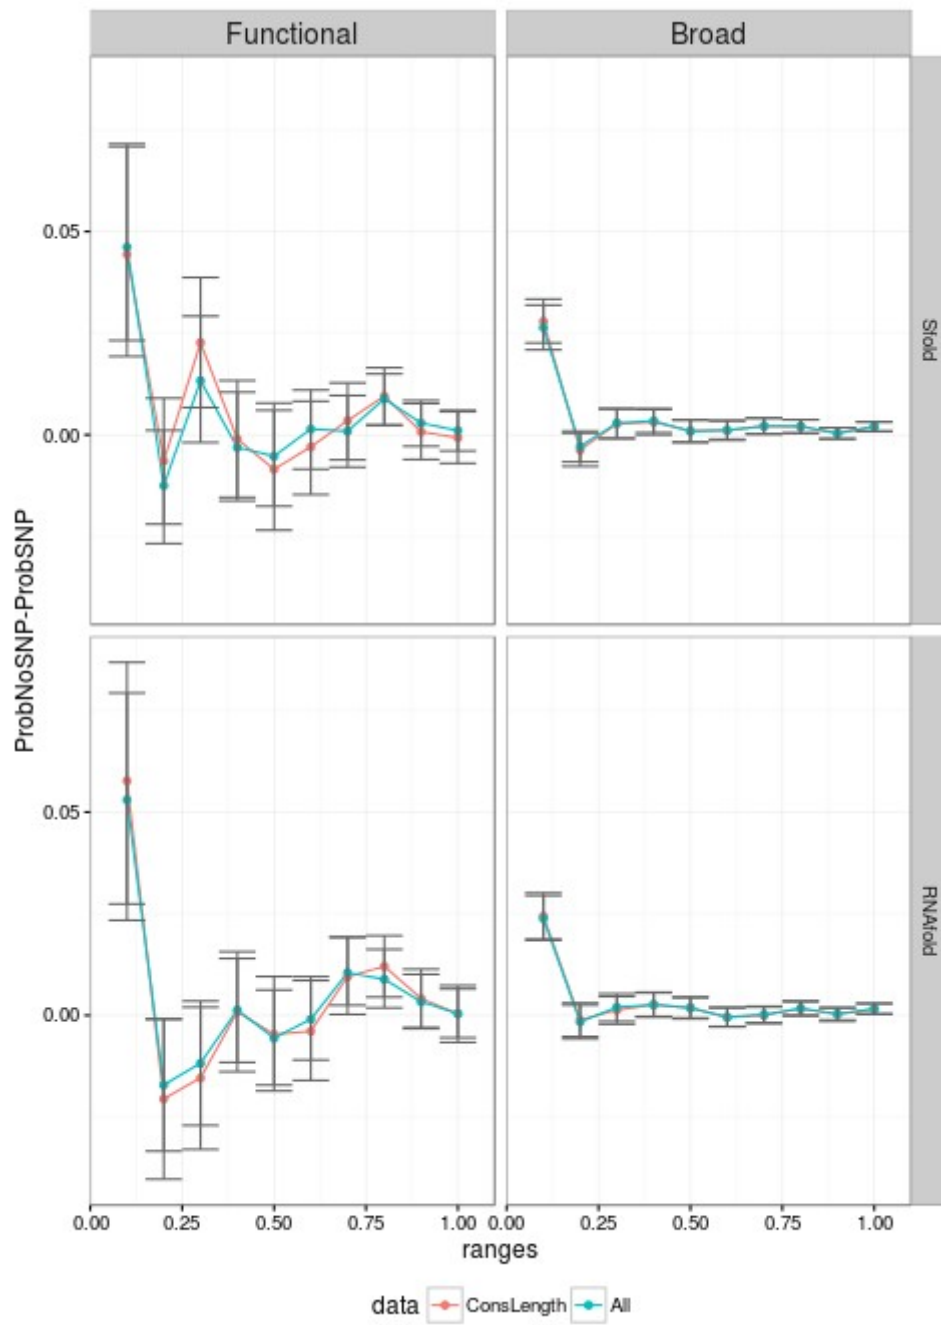

Sup. Fig. 13

Sup. Fig. 14

**a**

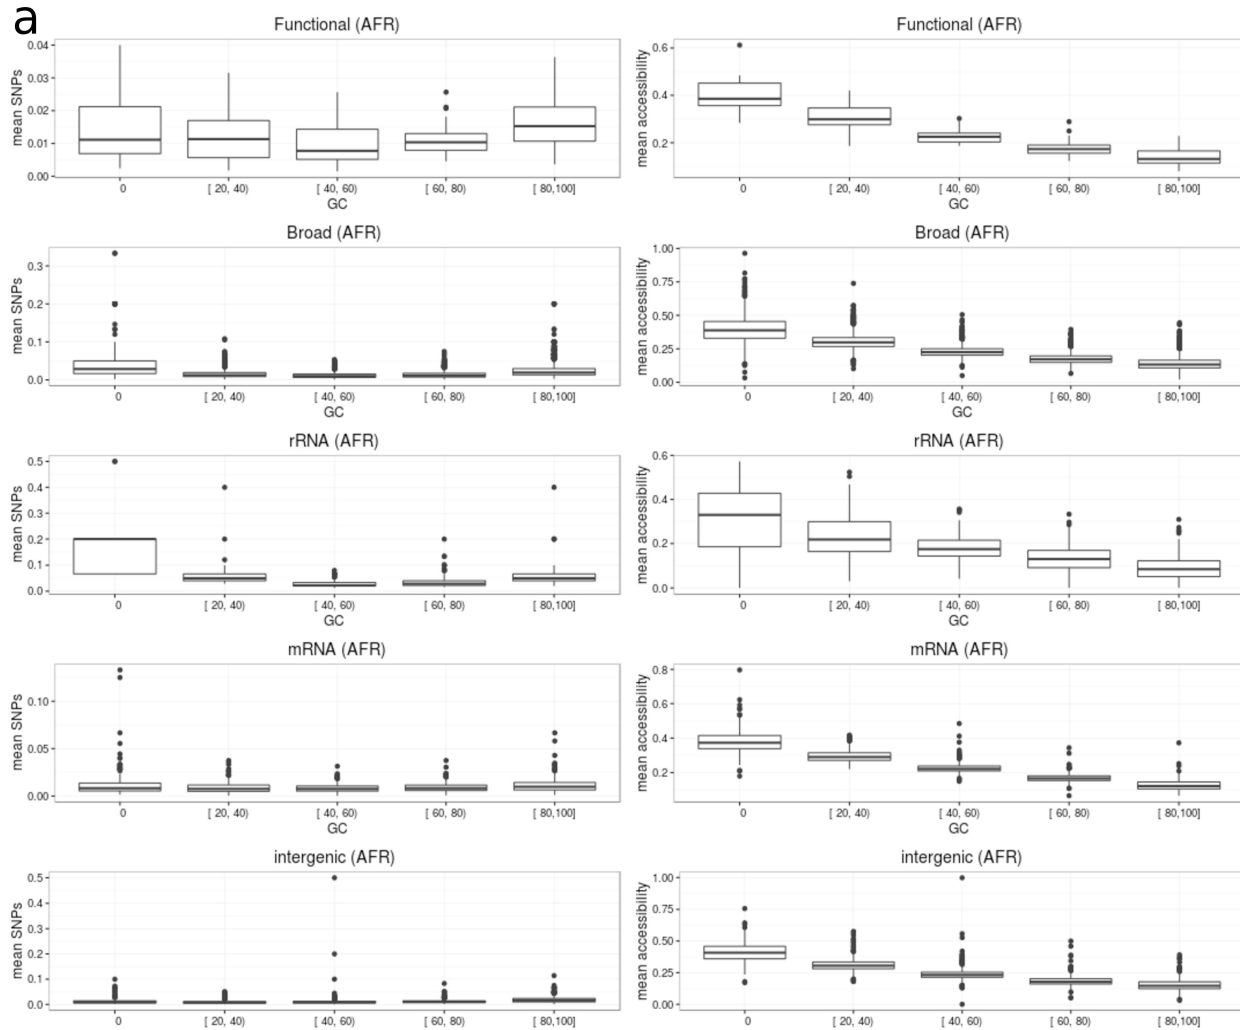

**b**

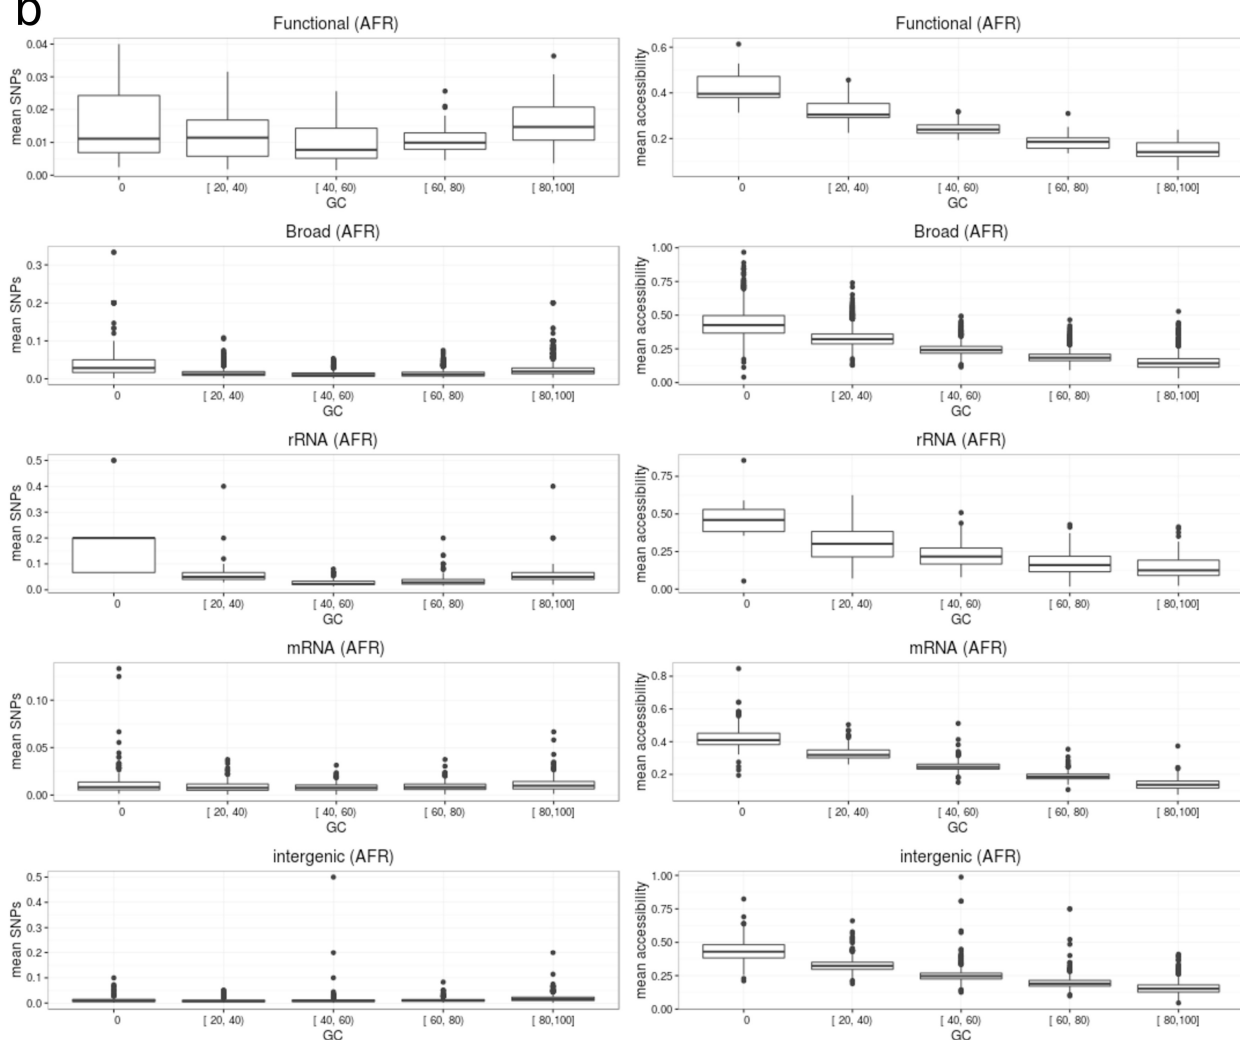

Sup. Fig. 14 **C**

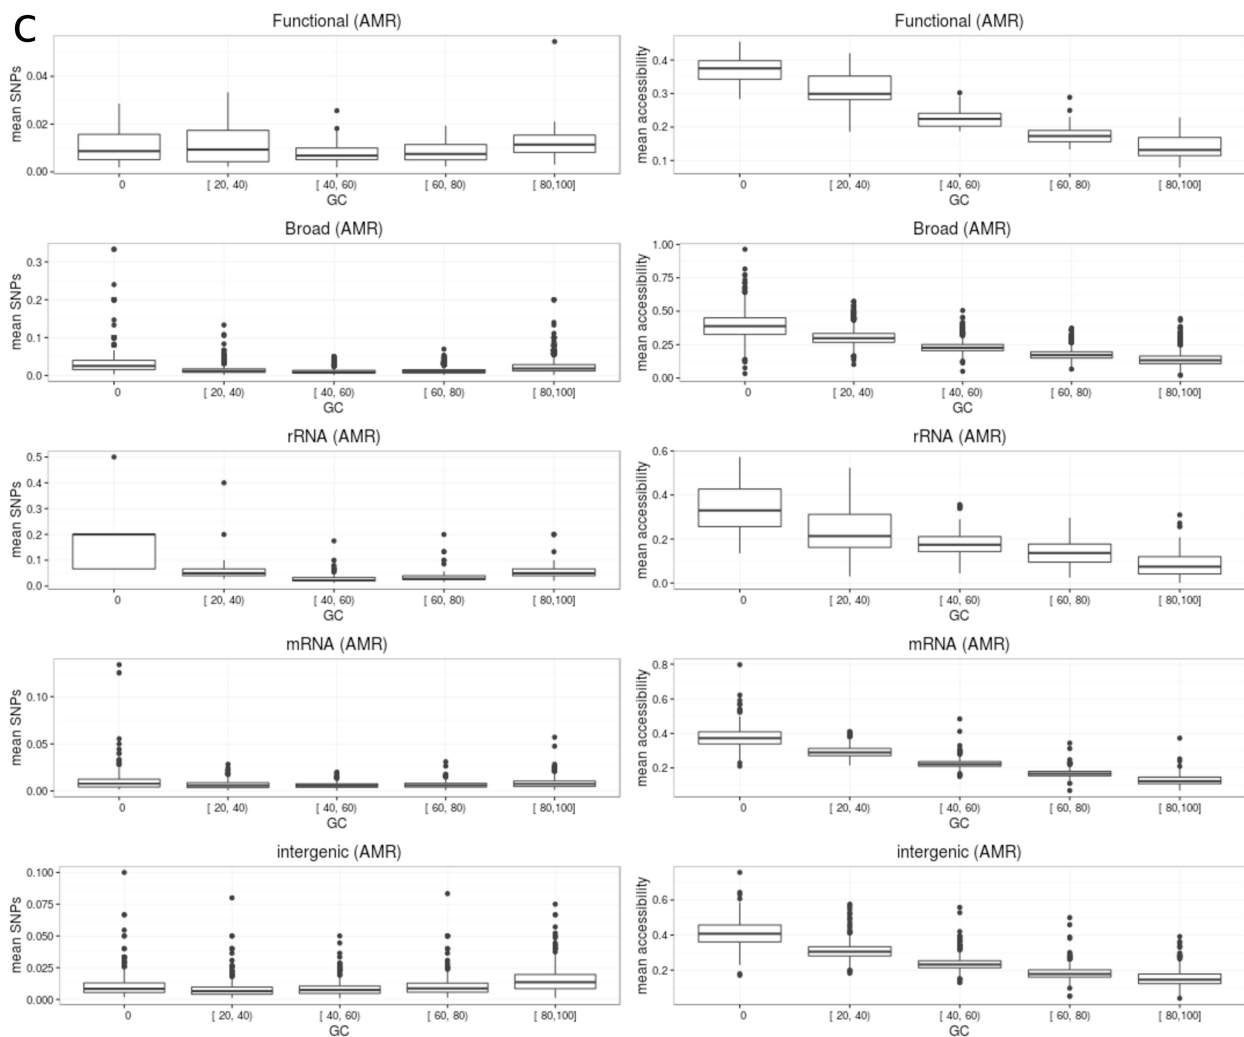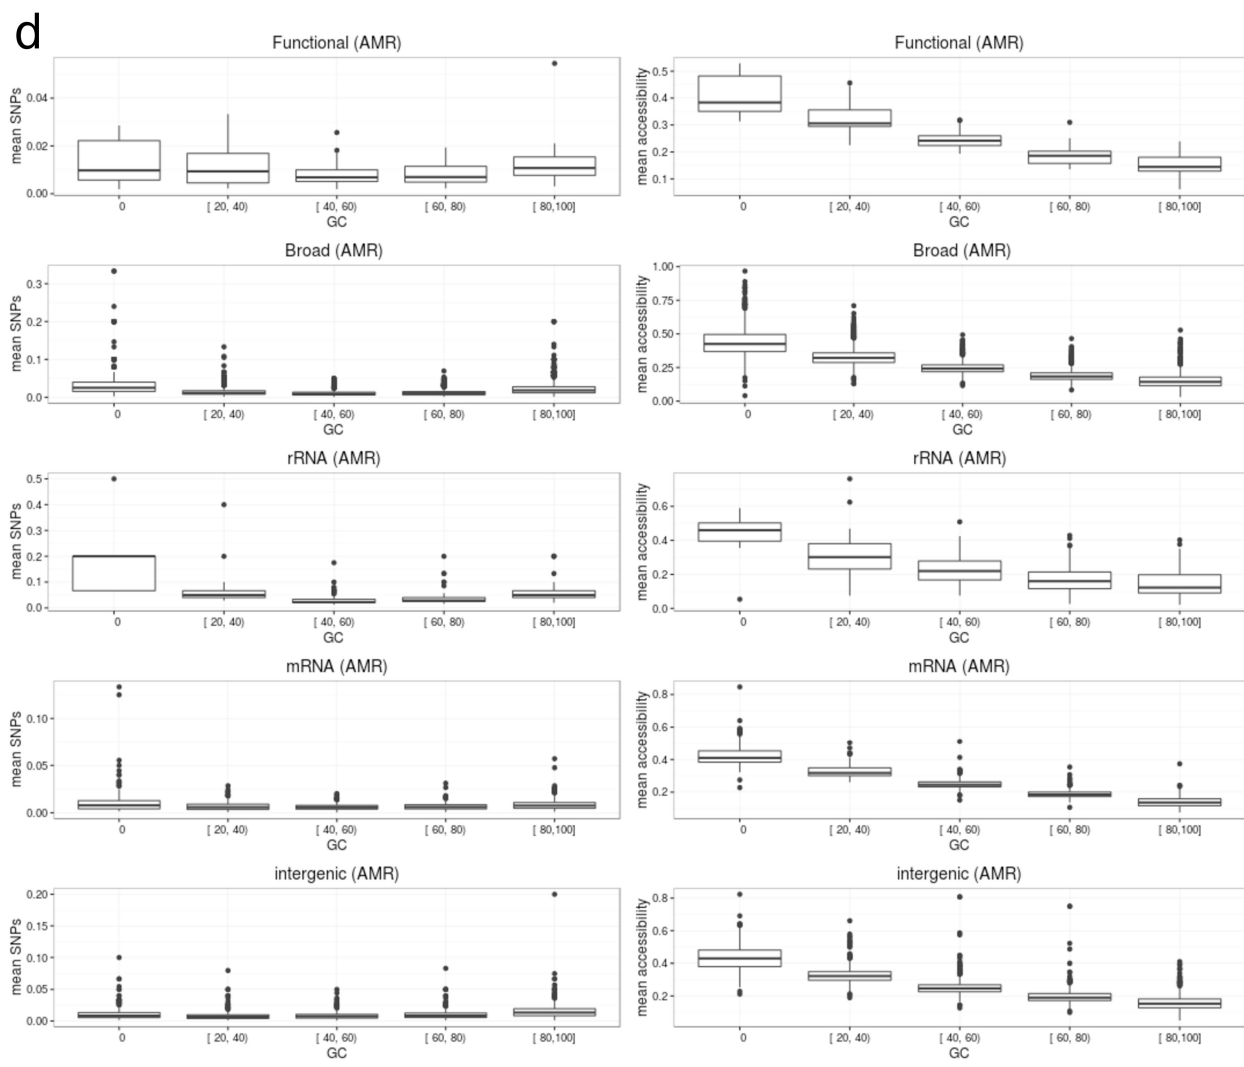

Sup. Fig.14

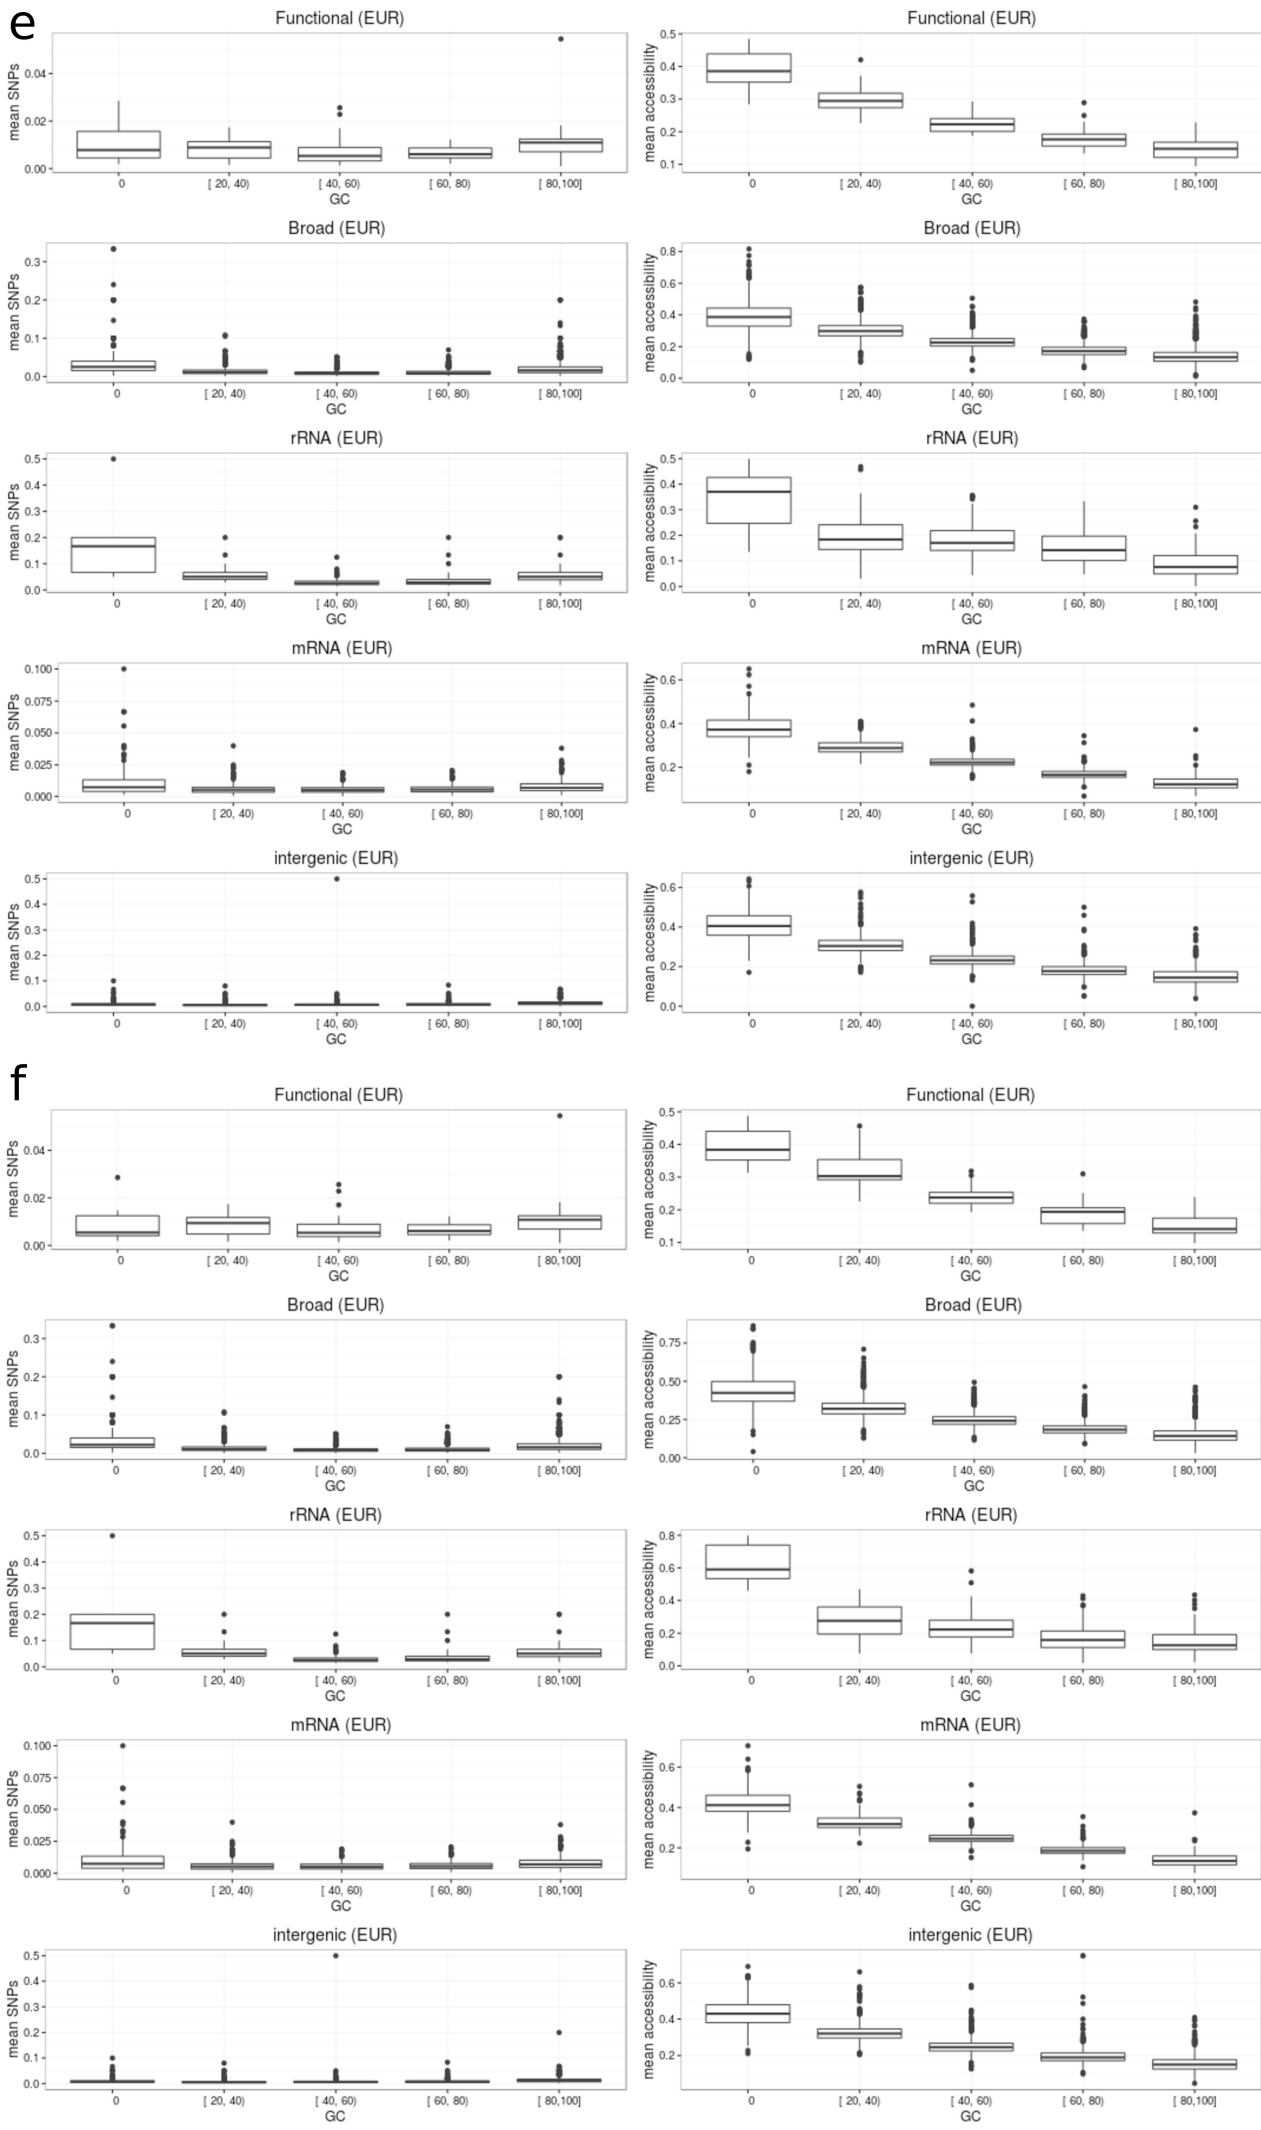

Sup. Fig. 14

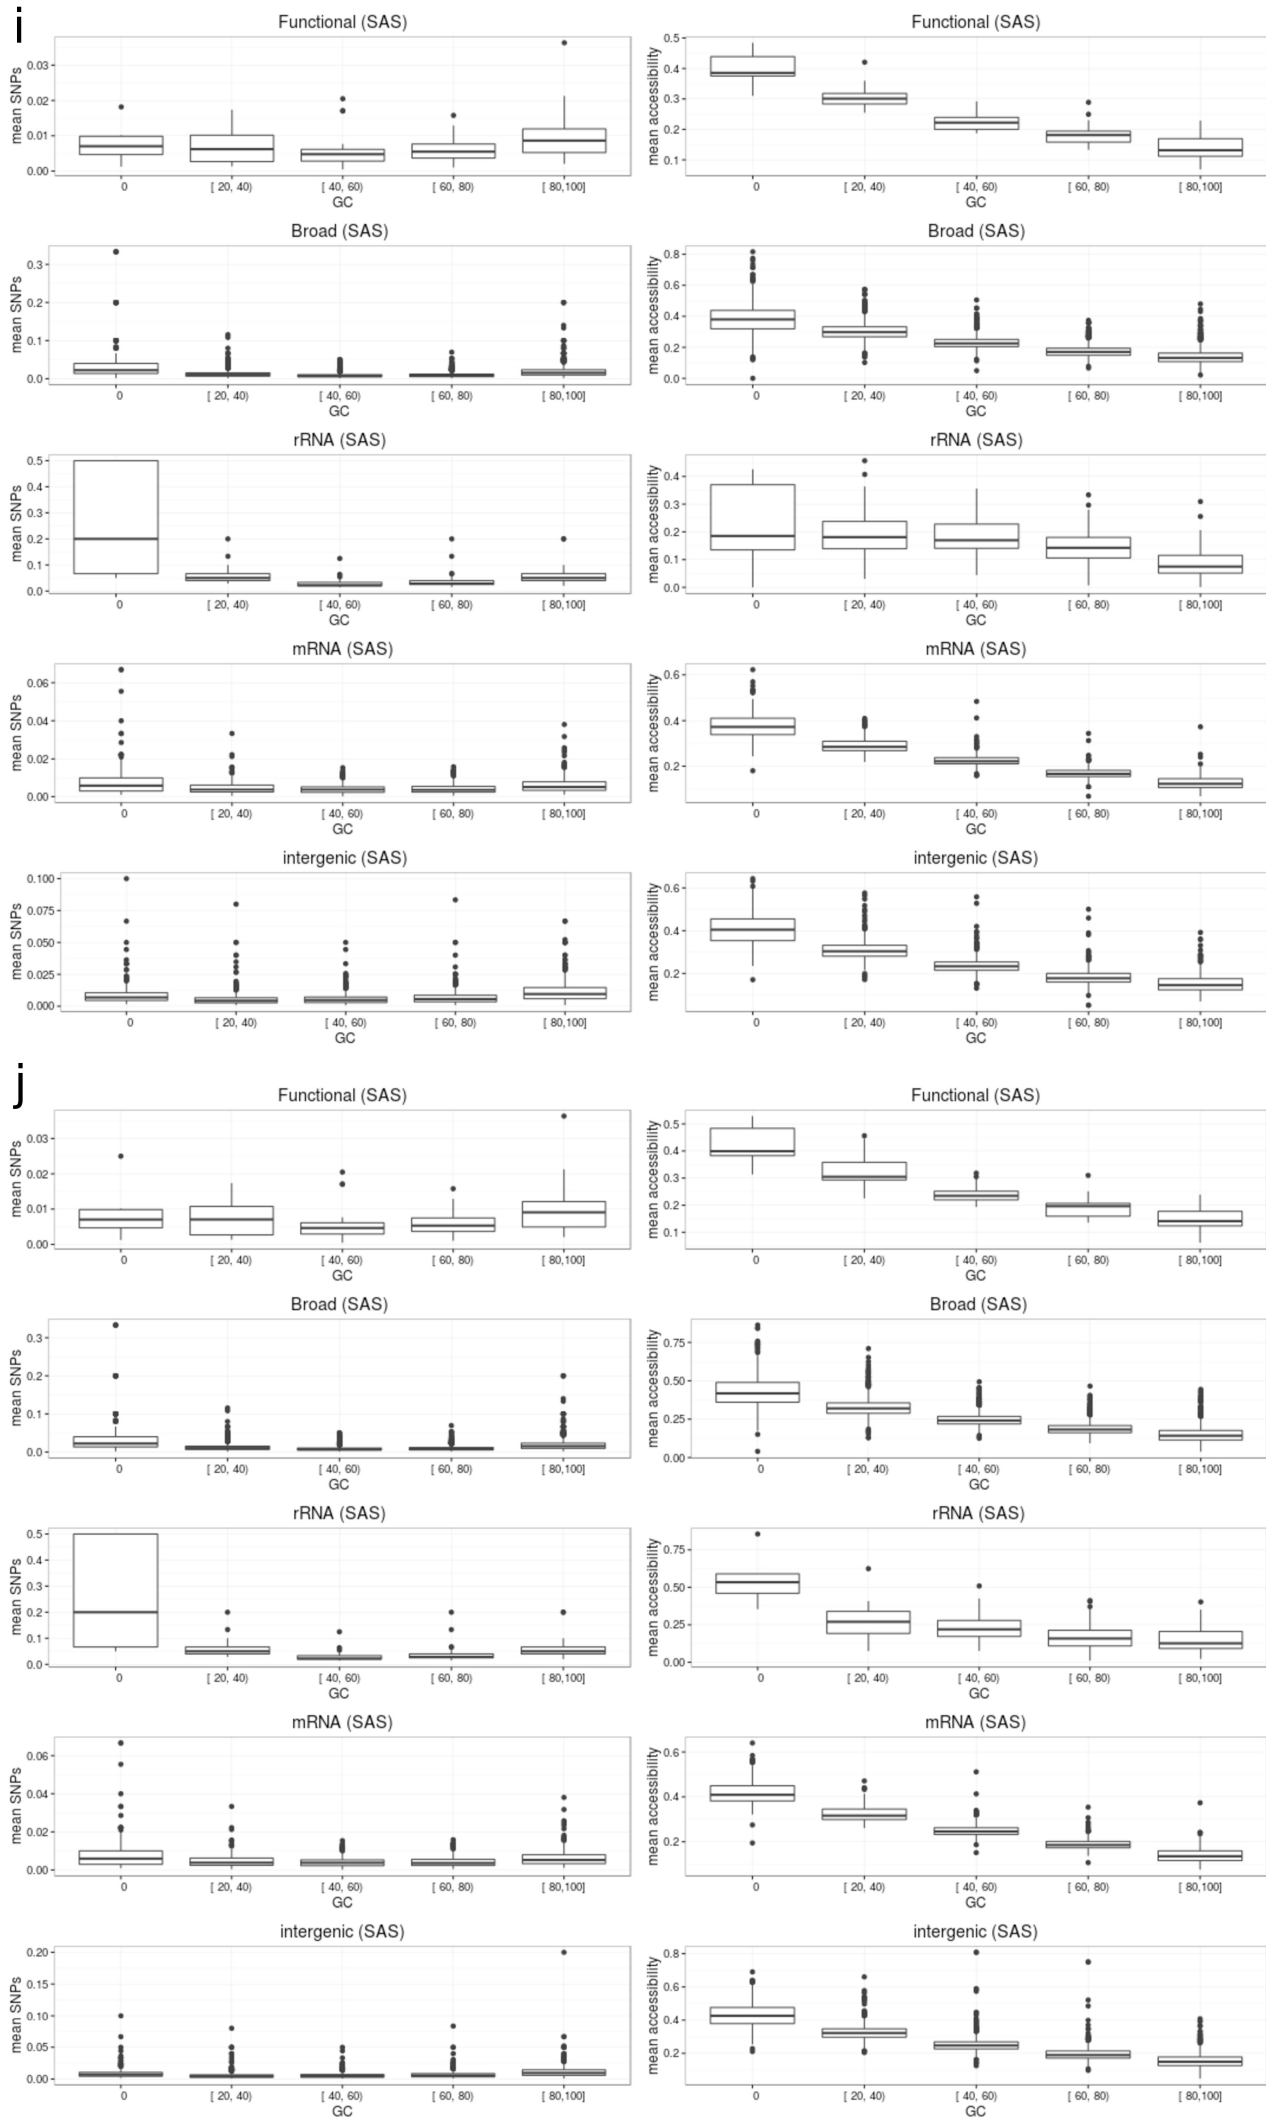

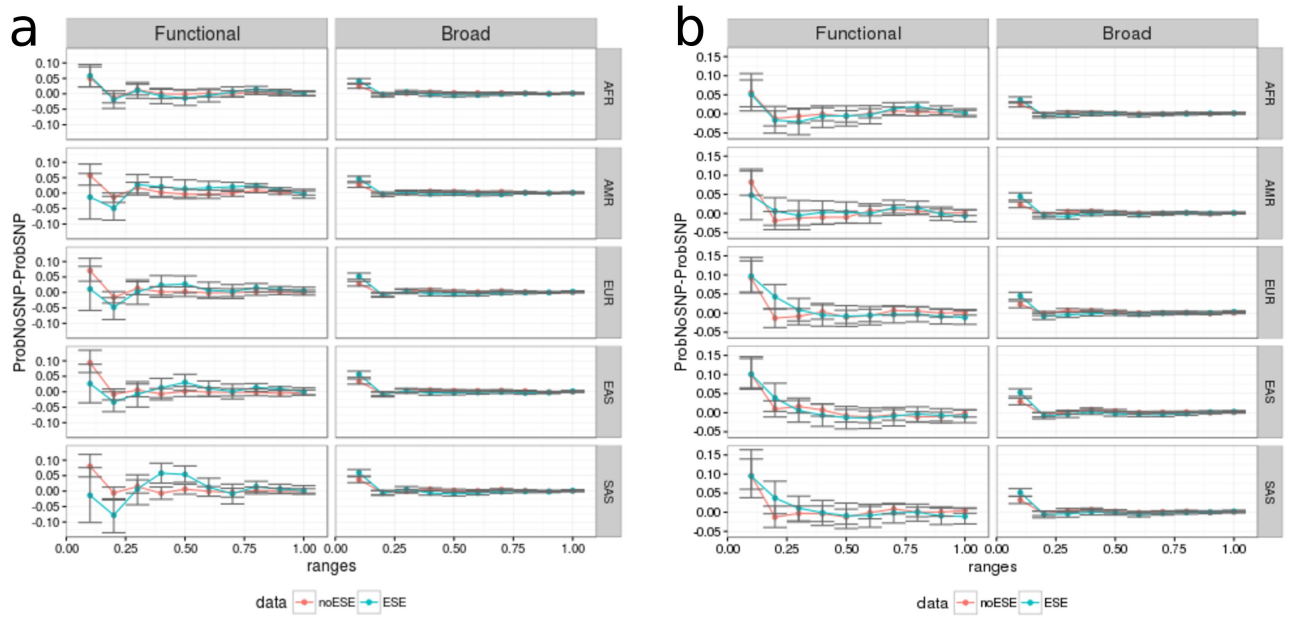

Sup. Fig. 15
